# Supplementary material for: Interplay between Fungal Infection and Bacterial Associates in the Wax Moth Galleria mellonella under Different Temperature Conditions
Source: MDPI journal article supplement (doi:10.3390/jof6030170), 2020-09-10
Supplement: s1 [file s1]

## ELECTRONIC SUPPLEMENTARY MATERIAL

### Interplay between fungal infection and bacterial associates in the wax moth *Galleria mellonella* under different temperature conditions

Vadim Yu Kryukov<sup>1</sup>, Elena Kosman<sup>1</sup>, Oksana Tomilova<sup>1</sup>, Olga Polenogova<sup>1</sup>, Ulyana Rotskaya<sup>1</sup>, Maksim Tyurin<sup>1</sup>, Tatyana Alikina<sup>2</sup>, Olga Yaroslavtseva<sup>1</sup>, Marsel Kabilov<sup>2</sup>, Viktor Glupov<sup>1</sup>

<sup>1</sup> Institute of Systematics and Ecology of Animals SB RAS, Frunze str. 11, 630091 Novosibirsk, Russia; [krukoff@mail.ru](mailto:krukoff@mail.ru)

<sup>2</sup> Institute of Chemical Biology and Fundamental Medicine SB RAS, Lavrentiev av. 8, Novosibirsk 630090, Russia; [kabilov@niboch.nsc.ru](mailto:kabilov@niboch.nsc.ru)

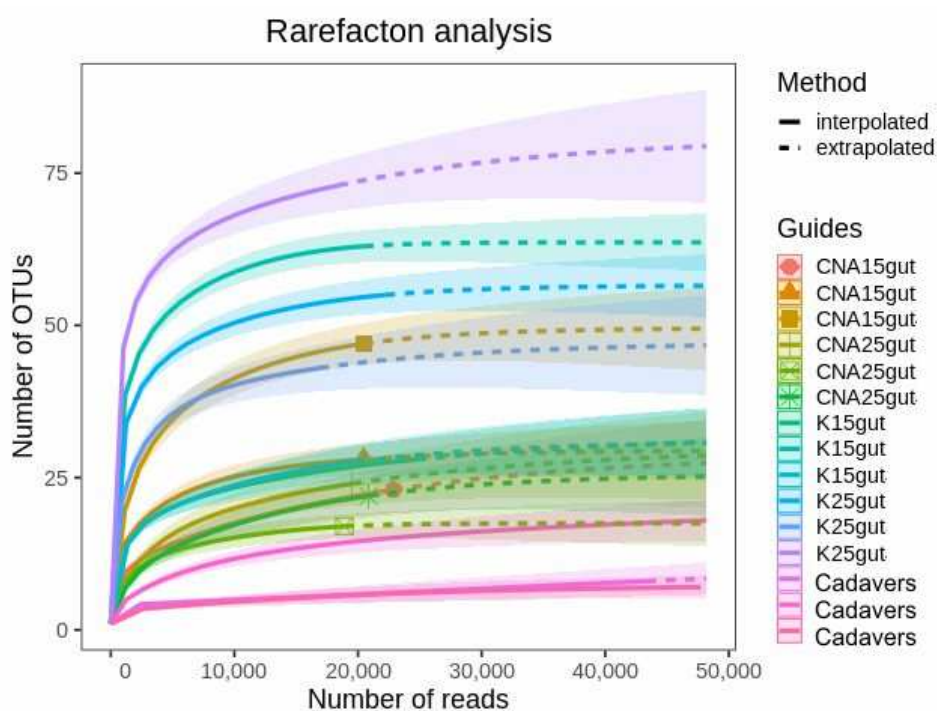

**Figure S1.** Rarefaction curves of the OTU number for each sample. CNA - infection with *C. militar*, K - control, 15 and 25 - temperature °C, cadavers - bacterial decomposed larvae.

**Table S1.** List and description of genes and primers sequences used in the qPCR.

| Gene Name                                    | NCBI genebank Accession number | Gene symbol | Primer sequence (5' – 3')                                   | Product size (bp) | PCR efficiency (±SD)                 | Tm in qPCR, °C | Primers source                                |
|----------------------------------------------|--------------------------------|-------------|-------------------------------------------------------------|-------------------|--------------------------------------|----------------|-----------------------------------------------|
| Translation elongation factor 1-alfa         | AF423811.1                     | EF1a        | For CTGAACCTCCTTACAGTGAATCC<br>Rev GCATGTTATCTCCGTGCCAG     | 135               | 1,96±0,1/<br>1,93±0,06/<br>1,90±0,04 | 60/62/64       | Melo et al., (2013) <sup>b</sup><br>*modified |
| DNA-directed RNA polymerase II subunit RPB11 | XM_026902197.2                 | RBP11       | For CGCCAACCTTTGAATCATTCCTT<br>Rev TGGTGTCTGATCATGTTTCCAAGA | 136               | 2,04±0,01/<br>2,06±0,02/<br>1,97±0,1 | 60/62/64       | Rotskaya U.N. <sup>c</sup>                    |
| NOX-DUOX domain                              | XM_026901961.2                 | NOX-DUOX    | For AGAGTGGCATCCCTTTACTATTGTG<br>Rev CCGTCCAATCACCTTTGACTCG | 92                | 1,95±0,06                            | 64             | Lange et al., (2018) <sup>a</sup>             |
| Gallerimycin                                 | AF453824.1                     | Gal         | For GAAGTCTACAGAATCACACGA<br>Rev ATCGAAGACATTGACATCCA       | 161               | 1,7±0,001                            | 62             | Melo et al., (2013) <sup>b</sup>              |
| Gloverin                                     | AF394588.1                     | Glo         | For AGATGCACGGTCTACAG<br>Rev GATCGTAGGTGCCTTGTG             | 93                | 1,91±0,02                            | 62             | Melo et al., (2013) <sup>b</sup>              |
| Galiomycin                                   | AY528421.1                     | Glm         | For GTGCGACGAATTACACCTC<br>Rev TACTCGCACCAACAATTGAC         | 103               | 2,07±0,02                            | 62             | Melo et al., (2013) <sup>b</sup>              |
| Inhibitor of apoptosis protein               | FJ643490.1                     | IAP         | For ACTTTCAACGATTGGCCGCT<br>Rev TCCCAATCTTTAAGACCGCCG       | 128               | 1,94±0,02                            | 64             | Rotskaya U.N. <sup>c</sup>                    |
| Heat shock protein 70                        | XM_031909614.1                 | Hsp70       | For CGACGACCCCAAGATACAACAG<br>Rev CGTCTCGCCCTTGAACCTCC      | 100               | 1,95±0,01                            | 64             | Rotskaya U.N. <sup>c</sup>                    |
| Heat shock protein 90                        | AF394591.1                     | Hsp90       | For TCAGCTTACGGACAGCTTCT<br>Rev GACCCCAGAGCTTGCATTGG        | 152               | 2,02±0,01                            | 62             | Rotskaya U.N. <sup>c</sup>                    |
| Cecropin-like                                | XM_026898304.2                 | Cec         | For CTGTTTCGTGTTTCGCTTGTGT<br>Rev GTGGTAGGCGAAGCAGCTAC      | 158               | 1,99±0,02                            | 64             | Lange et al., (2018) <sup>a</sup>             |
| Lysozym-like                                 | XM_026894466.2                 | Lys         | For GGACTGGTCCGAGCACTTAG<br>Rev CACGGTTGCCTCTAAATGCG        | 253               | 1,93±0,02                            | 60             | Lange et al., (2018) <sup>a</sup>             |

\*modified – primers were modified by Rotskaya U.N.

<sup>a</sup> Lange et al, *Frontiers in Immunology* (2018) <https://doi.org/10.3389/fimmu.2018.02114>

<sup>b</sup> Melo et al., *PlosOne*, Dataset, (2013). [10.1371/journal.pone.0078905](https://doi.org/10.1371/journal.pone.0078905)

<sup>c</sup> Primers were designed in the Laboratory of Insect Pathology ISEA SB RAS with an online resource, <https://www.ncbi.nlm.nih.gov/tools/primer-blast/>, and their properties were estimated by IDT OligoAnalyzer 3.1 (<http://eu.idtdna.com/calc/analyzer>).

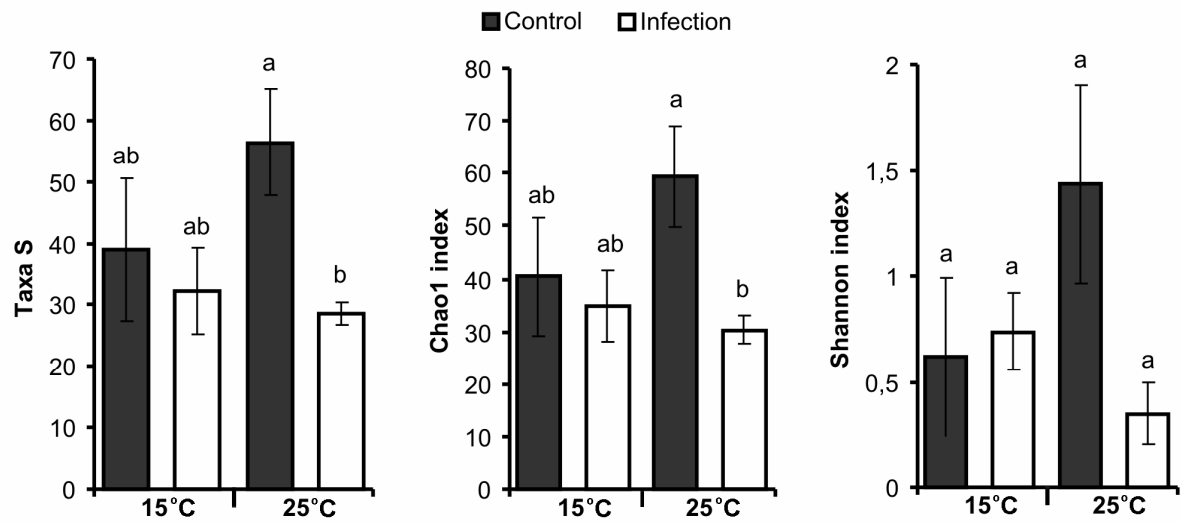

**Figure S2.** Diversity indexes of bacterial communities in midgut of wax moth larvae at 96 h post injection of *C. militar* (2500 conidia per larva) and the incubation under 15°C and 25°C. Indexes were calculated for OTU level. Different letters indicate significant differences between treatments (Dunn's test,  $P < 0.05$ ).

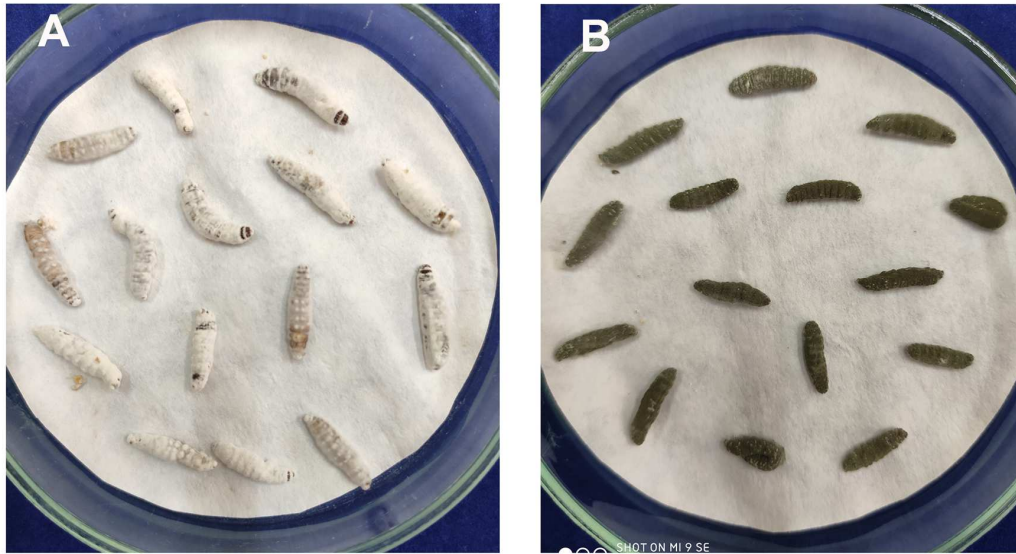

**Figure S3.** Wax moth larvae overgrowing with *B. bassiana* (A) and *M. robertsii* (B) at four day after injection with 2,500 conidia per larva and incubation under 25°C.
